CORRECTION

# Correction: Technique for Early Reliability Prediction of Software Components Using Behaviour Models

Awad Ali, Dayang N. A. Jawawi, Mohd Adham Isa, Muhammad Imran Babar

The affiliation for the second and third authors is incorrect. Dayang N. A. Jawawi and Mohd Adham Isa are not affiliated with #1 but #2 Department of Software Engineering, Faculty of Computing, Universiti Teknologi Malaysia, UTM, 81310 Skudai, Johor, Malaysia.

## Reference

1. Ali A, N. A. Jawawi D, Adham Isa M, Imran Babar M (2016) Technique for Early Reliability Prediction of Software Components Using Behaviour Models. PLoS ONE 11(9): e0163346. doi: [10.1371/journal.pone.0163346](https://doi.org/10.1371/journal.pone.0163346) PMID: [27668748](https://pubmed.ncbi.nlm.nih.gov/27668748/)

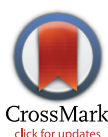

## OPEN ACCESS

**Citation:** Ali A, N. A. Jawawi D, Adham Isa M, Imran Babar M (2016) Correction: Technique for Early Reliability Prediction of Software Components Using Behaviour Models. PLoS ONE 11(12): e0168722. doi:10.1371/journal.pone.0168722

**Published:** December 15, 2016

**Copyright:** © 2016 Ali et al. This is an open access article distributed under the terms of the [Creative Commons Attribution License](https://creativecommons.org/licenses/by/4.0/), which permits unrestricted use, distribution, and reproduction in any medium, provided the original author and source are credited.
